# Supplementary material
Source: publisher figshare collection journal article supplement (https://gsajournals.figshare.com/articles/dataset/_/8020103)
Supplement: Supplementary file 3 [file 2]

|                         | <b>Genotype used</b>                                                                          |
|-------------------------|-----------------------------------------------------------------------------------------------|
| <b>Figure 1</b>         | <i>y, w, UbxFLP ; FRT82Bttk<sup>le11</sup> / FRT82B ubi-nls::GFP</i>                          |
|                         | <i>y, w, UbxFLP ; Ase(5)::GFP/+; FRT82 ttk<sup>le11</sup> / FRT82B ubi-nls::GFP</i>           |
| <b>Figures 2 and 3</b>  | <i>y, w, UbxFLP ; FRT82B ttk<sup>le11</sup> / FRT82B ubi-nls::GFP</i>                         |
|                         | <i>y, w, UbxFLP ; neur::GFP; FRT82B ttk<sup>le11</sup> / FRT82B ubi-nls::GFP</i>              |
| <b>Figure 4</b>         | <i>y, w, UbxFLP ; cycE<sup>AR95/+</sup>, FRT82Bttk<sup>le11</sup> / FRT82B ubi-nls::GFP</i>   |
|                         | <i>y, w, UbxFLP ; cycE::lacZ-4.6WT/+; FRT82B ttk<sup>le11</sup> / FRT82B ubi-nls::GFP</i>     |
|                         | <i>y, w, UbxFLP ; cycE::lacZ-4,6m/+; FRT82B ttk<sup>le11</sup> / FRT82B ubi-nls::GFP</i>      |
| <b>Figure 5</b>         | <i>y, w, UbxFLP ; FRT82B ttk<sup>le11</sup> / TM6</i>                                         |
|                         | <i>y, w, UbxFLP ; cycE::lacZ-D/+; FRT82B ttk<sup>le11</sup> / FRT82B ubi-nls::GFP</i>         |
|                         | <i>y, w, UbxFLP ; cycE::lacZ-ΔD/+; FRT82B ttk<sup>le11</sup> / FRT82B ubi-nls::GFP</i>        |
| <b>Figure 6</b>         | <i>UAS-His::YFP ; neur<sup>p72</sup></i>                                                      |
|                         | <i>UAS-His::YFP; neur<sup>p72</sup>, tub-Gal80<sup>ts</sup></i>                               |
|                         | <i>UAS-His::YFP / UAS-ttk69; neur<sup>p72</sup>, tub-Gal80<sup>ts</sup></i>                   |
| <b>Figure 7</b>         | <i>y, w, UbxFLP ; FRT82B ttk<sup>le11</sup> / FRT82B ubi-nls::GFP</i>                         |
|                         | <i>y, w, UbxFLP ; FRT40A ham<sup>1</sup>; FRT82B ttk<sup>le11</sup> / FRT82B ubi-nls::GFP</i> |
| <b>Figure S2</b>        | <i>cycE-lacZ-4.6</i>                                                                          |
|                         | <i>cycE-lacZ-4,6m</i>                                                                         |
|                         | <i>cycE-lacZ-ΔAC</i>                                                                          |
|                         | <i>cycE-lacZ-ΔB</i>                                                                           |
|                         | <i>cycE::lacZ-ΔD</i>                                                                          |
|                         | <i>cycE::lacZ-D</i>                                                                           |
| <b>Figure S3</b>        | <i>UAS-His::YFP ; neur<sup>p72</sup>, tub-Gal80<sup>ts</sup></i>                              |
|                         | <i>UAS-His::YFP ; neur<sup>p72</sup>, tub-Gal80<sup>ts</sup> / UAS-ham</i>                    |
|                         | <i>UAS-His::YFP / UAS-HA::seq; neur<sup>p72</sup>, tub-Gal80<sup>ts</sup></i>                 |
|                         | <i>y, w, UbxFLP ; FRT40A ham<sup>1</sup> / FRT40A ubi-nls::GFP</i>                            |
|                         | <i>y, w, UbxFLP ; FRT42 seq<sup>A41</sup> / FRT42 ubi-nls::GFP</i>                            |
| <b>Figure S4</b>        | <i>UAS-Mep1GL00319; UAS-His::YFP; neur<sup>p72</sup></i>                                      |
|                         | <i>UAS-Mep124534; UAS-His::YFP; neur<sup>p72</sup></i>                                        |
|                         | <i>UAS-His::YFP; neur<sup>p72</sup> / UAS- trlGL00699</i>                                     |
|                         | <i>UAS-His::YFP; neur<sup>p72</sup> / UAS-trIHMS02188</i>                                     |
|                         | <i>UAS-Mi-2<sup>RNAi</sup> / UAS-His::YFP; neur<sup>p72</sup></i>                             |
|                         | <i>UAS-Mi-2<sup>RNAi</sup> / UAS-His::YFP; neur<sup>p72</sup> / FRT82B ttk<sup>le11</sup></i> |
| <b>Movies S1</b>        | <i>neur::GFP</i>                                                                              |
| <b>Movies S2 and S3</b> | <i>y, w, UbxFLP ; neur::GFP; FRT82B ttk<sup>le11</sup> / FRT82B ubi-nls::GFP</i>              |

**Table S1. Fly genotypes.** Fly genotypes used in each figure.
