# Supplementary material
Source: publisher figshare collection journal article supplement (https://gsajournals.figshare.com/articles/dataset/_/8020103)

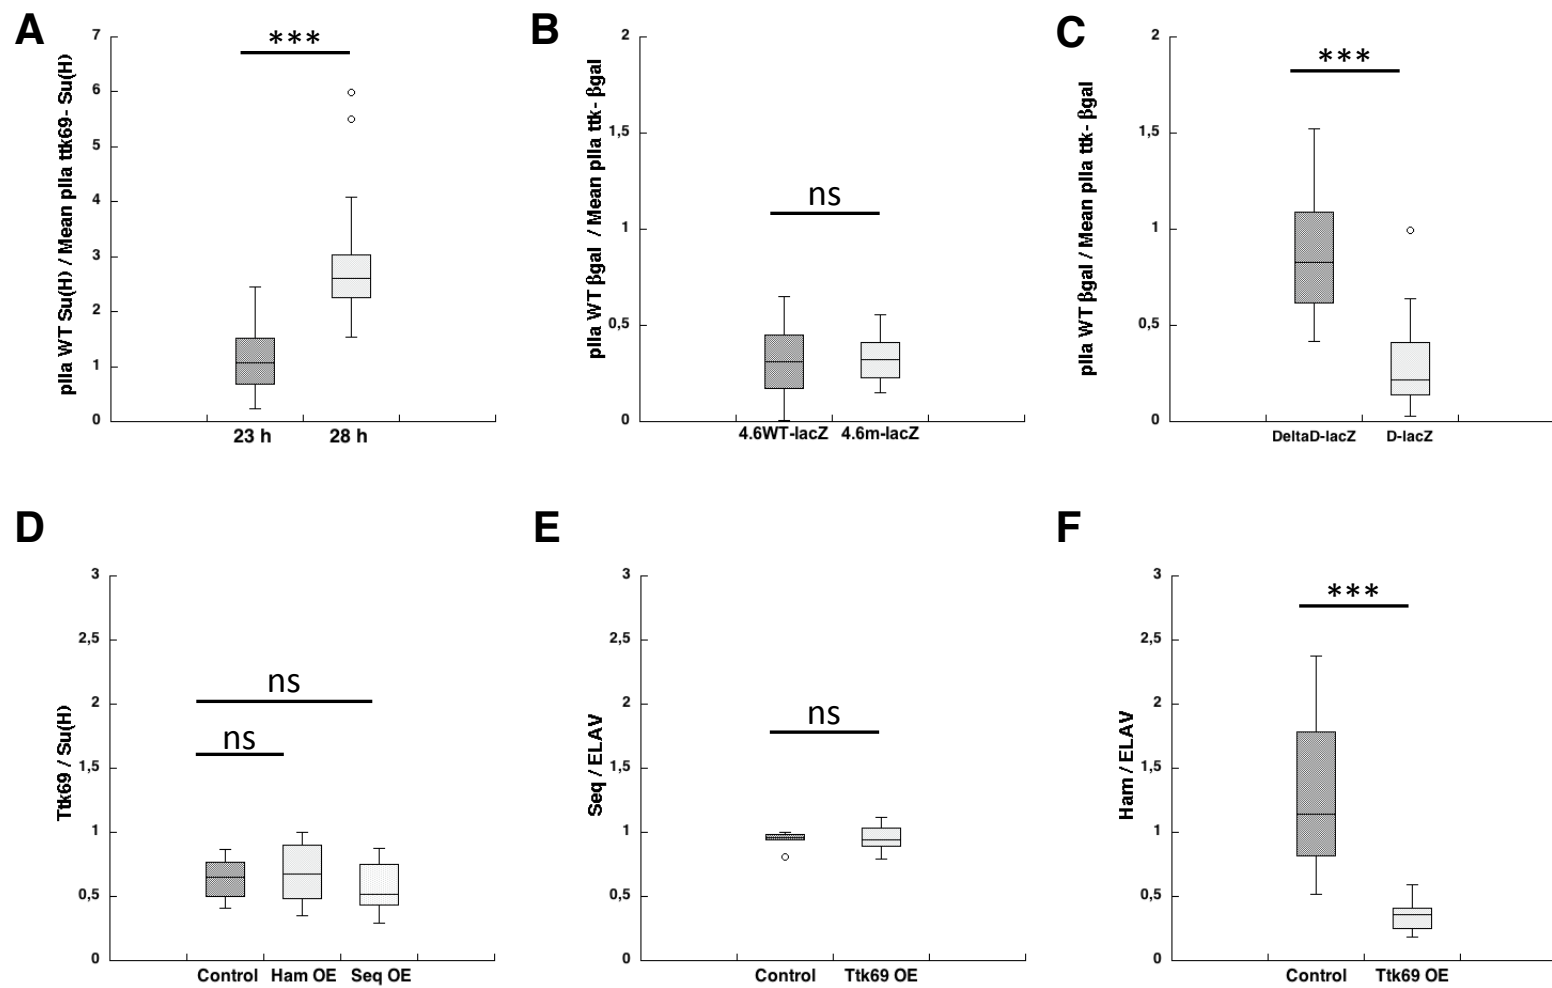

Figure S1

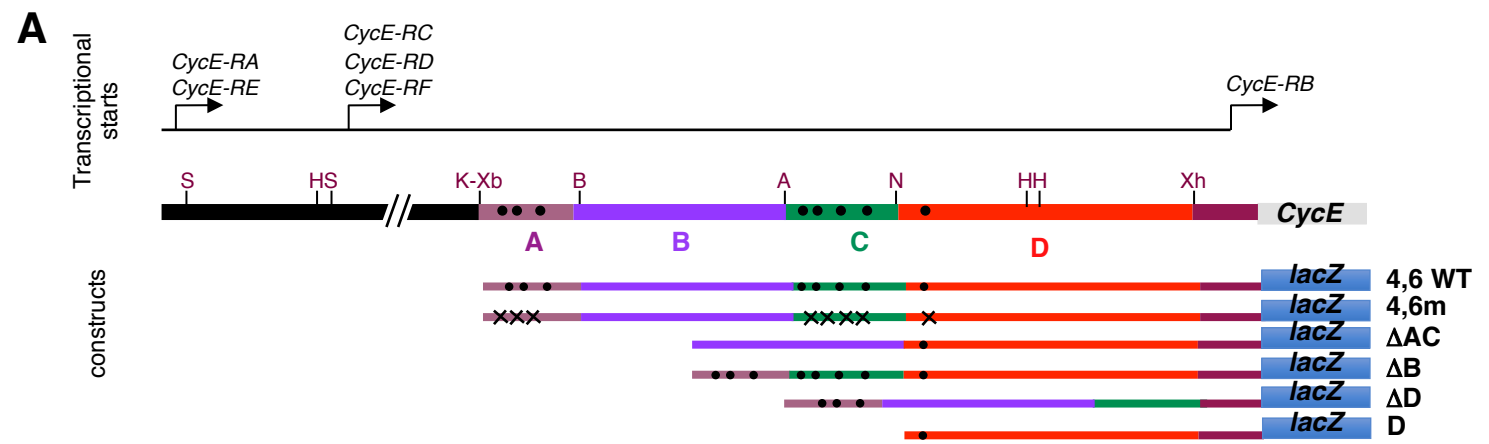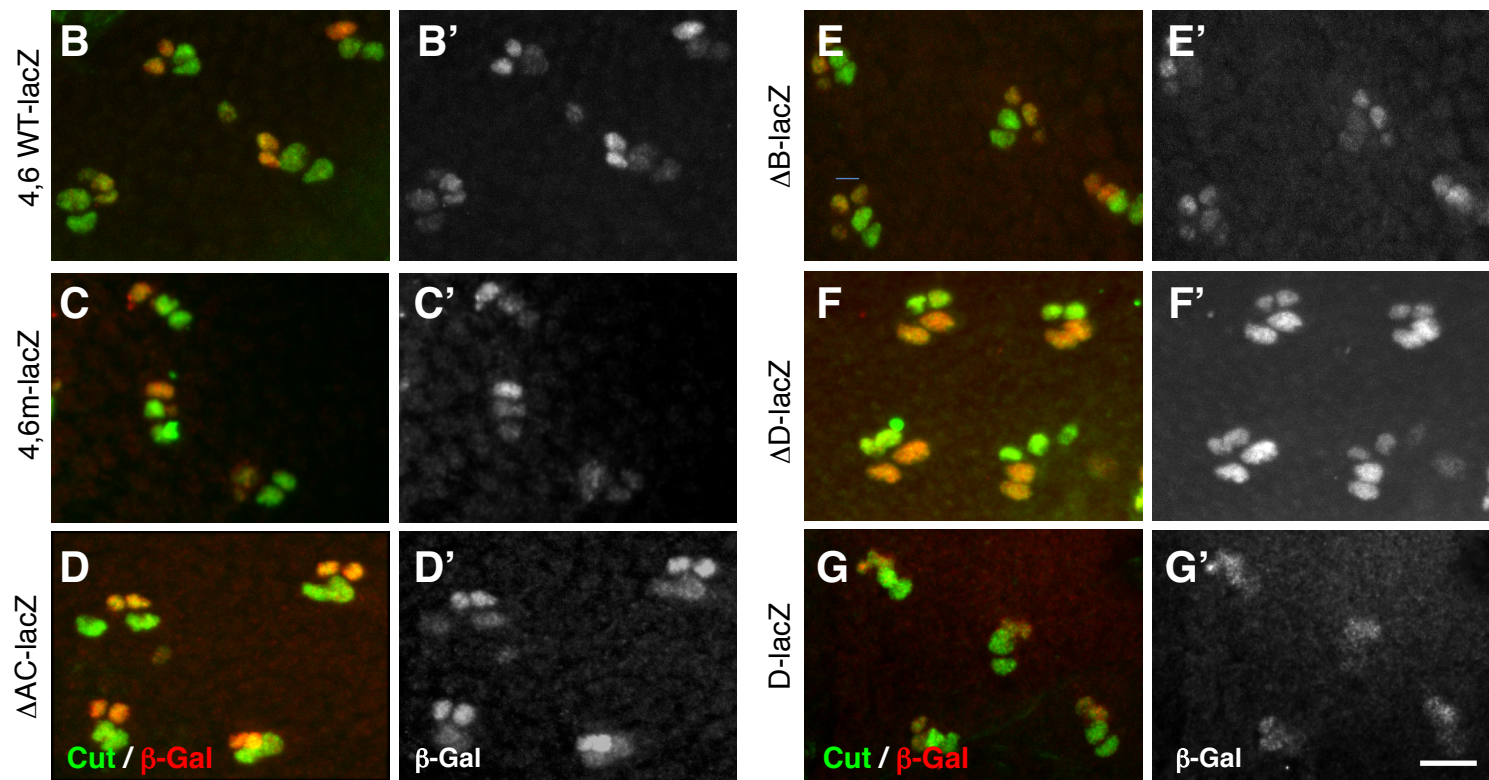

Figure S2

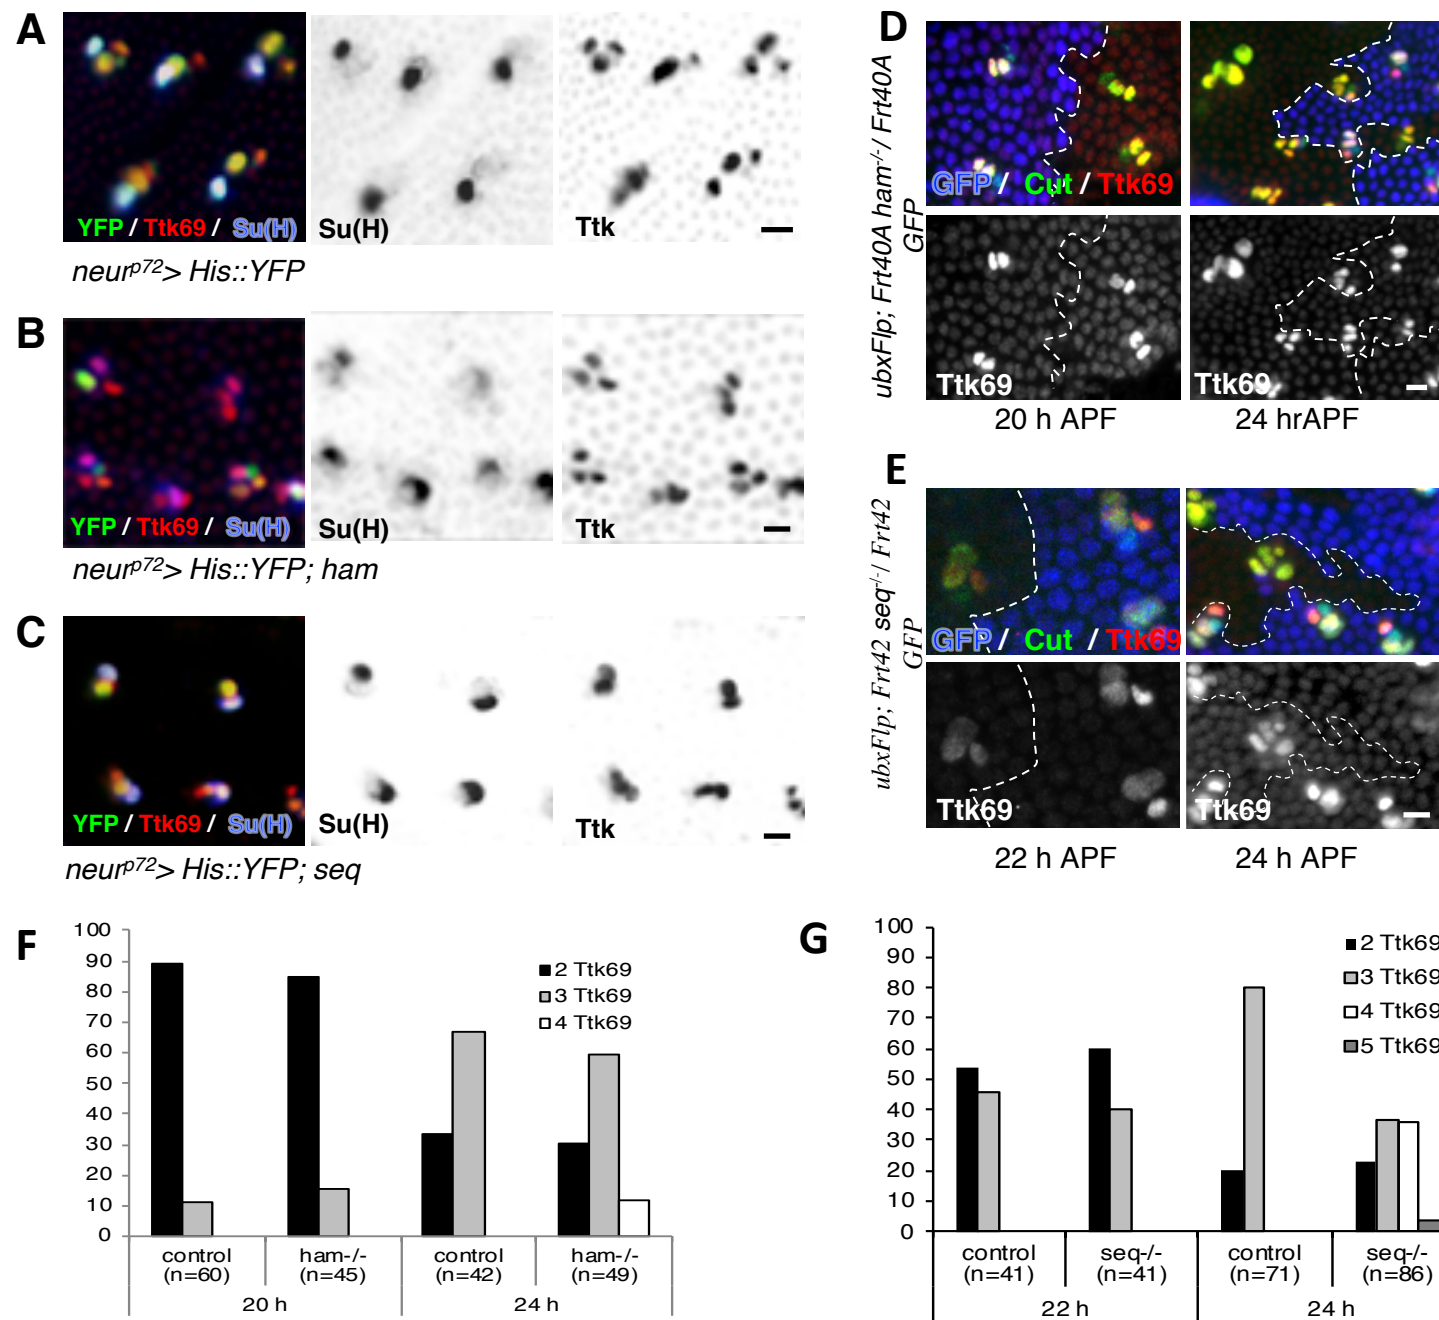

Figure S3

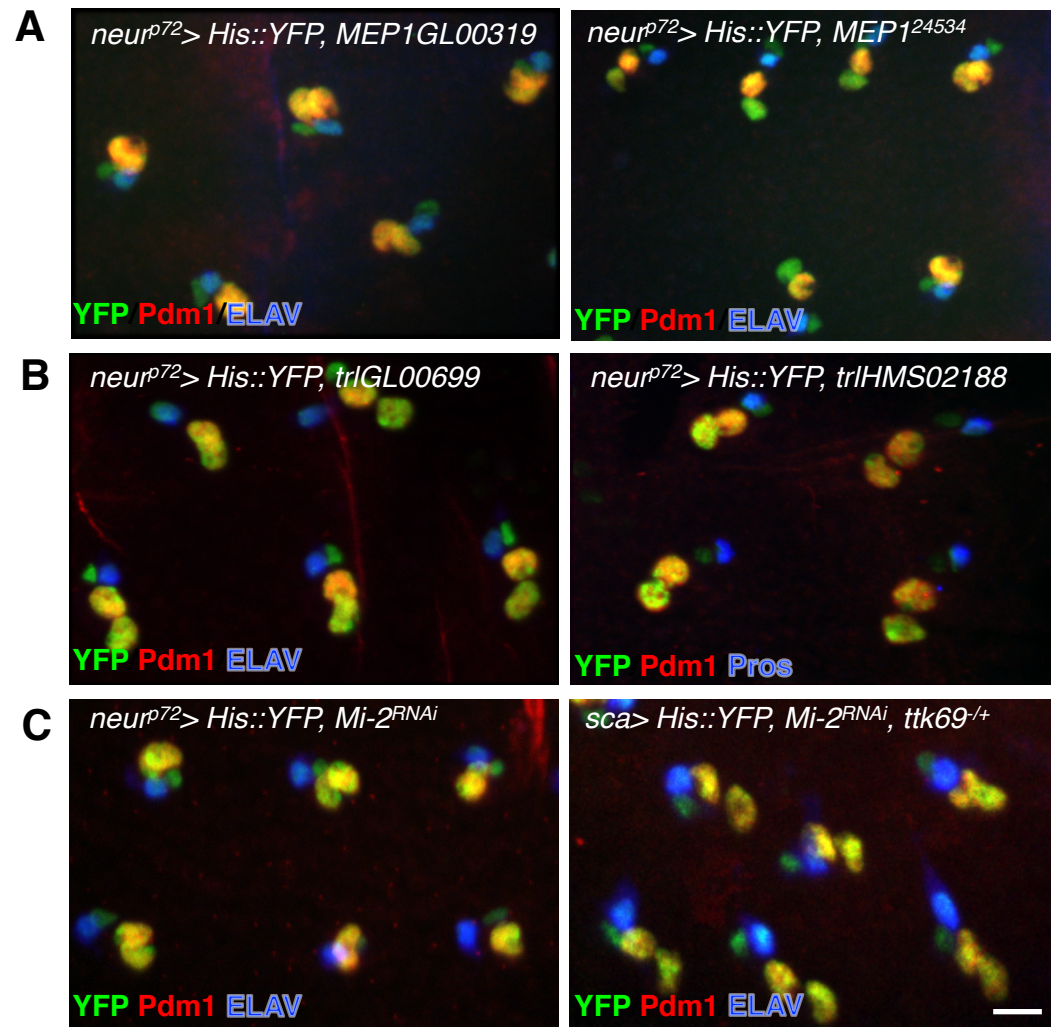

Figure S4

Supplement: Supplementary file 1 [file 2]
